# Supplementary material for: Two closely related Rho GTPases, Cdc42 and RacA, of the en-dophytic fungus Epichloë festucae have contrasting roles for ROS production and symbiotic infection synchronized with the host plant
Source: PubMed Central journal article supplement (PMC5785021; doi:10.1371/journal.ppat.1006840), 2018-01-25

# Ef-Cdc42

**Sequence** MAVVATIKCVVVG DGAVGKTCLLISYTTN **KFP**SEYVPTVFDNYA **V**TVM **I**GDEPYTLGL **F**DTAGQEDYDRLRPLSYPQTDVFLVCF SVTSPASFENVREKW  
**Prediction** CCCCC**SSSSSSS**CCCCC**HHHHHHHHH**CCCCCCCCCCCC**SSSSSSSSS**CC**SSSSSSSSS**CCCCCCCC**HHHHH**CCCC**SSSSSSS**CCC**HHHHHHHHHH**  
**Conf. Score** 9976357899999997679999999972989974588774115889999999999998878997532001454367998999999999767799999999  
**Sol. Acces.** 75424410000001200000001010333135511000011122334166440300000003243144113111440100000002336016104730

**FPEVHHHCPGVPCLIVGTQVDLREDPSVKDKLAKQKMAPVKKEDGDRMARELGAVKYVECSALTQFRLKDVFEAIVAAL EPPMPKKKSHKCLVL**  
**HHHHH**CCCCC**SSSSSS**CCCCC**HHHHHHHHH**CCCCC**HHHHHHHHHH**CCC**SSSS**CCCCCCCC**HHHHHHHHHHHH**CCCCCCCC**SSS**  
 9999853889988999889402335466888764568877999999999980998899788687979799999999997076678899988759  
 24103620470000000013002636622540474644204373034005404032000000234630440032002100335454657434301  
**H**:Helix; **S**:Strand; **C**:Coil

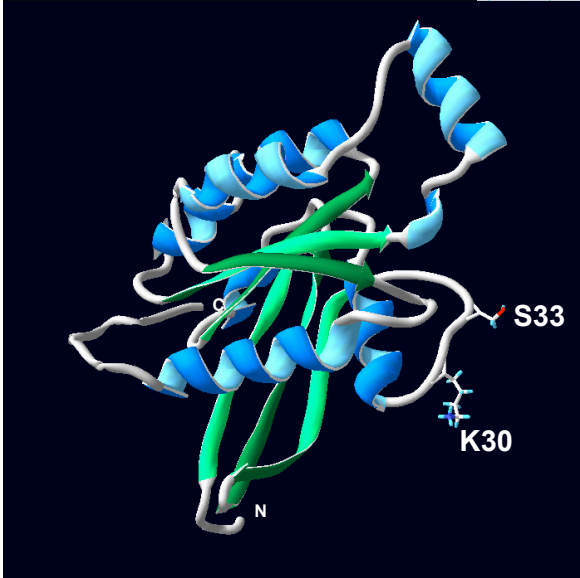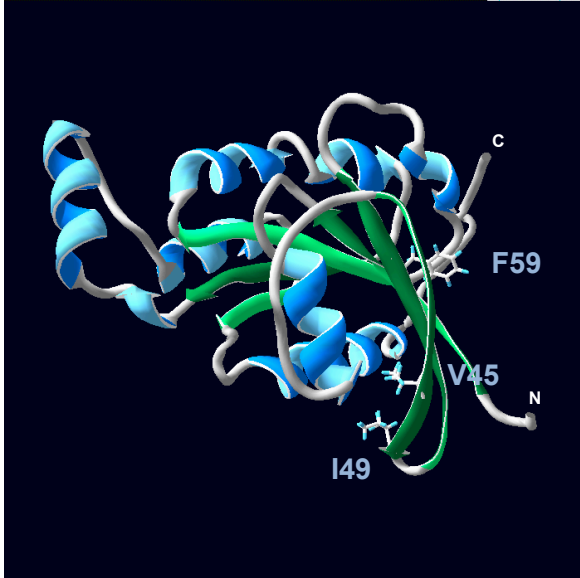

# Ef-RacA

**Sequence** MAQPGVQSLKCVVTGDGAVGKTCLLISYTTN **A**FP**G**EYIPTVFDNYS **A**SVMVDGKPIISLGLWDTAGQEDYDRLRPLSYPQTDVFLICFSIVSPPSFDNVKA  
**Prediction** CCCCC**SSSSSSS**CCCCC**HHHHHHHHH**CCCCCCCCCCCC**SSSSSSSSS**CC**SSSSSSSSS**CCCC**HHCC****HHHH**CCCC**SSSSSSS**CCC**HHHHHHHHH**  
**Conf. Score** 989876447999999998789999999609899976897137788999999999998878883213001254348998999999988889999999  
**Sol. Acces.** 855641430000000200000000100145514541100011222030315644030000000314314411311145010000000013360162037

**KWYPEIDHHPNIPIILVGTKLDLREDAATLDSLRQKRMPEVSYEQALACAREIKAYKYLECSALTQRNLKSVFDEAIRAVLNPRPQPSKHKKSKCSIL**  
**HHHHHHH**CCCCC**SSSSSS**CCCCC**HHHHHHHHH**CCCCC**HHHHHHHHHH**CCC**SSSS**CCCCCCCC**HHHHHHHHHHHHHH**CCCCCCCCCCCC**SSC**  
 9999997299999899978985445556677786556884338999999998099789989888786979999999999852755568899988879  
 202410362147000000001200263762264047474520437303400640403210000023463044003300310033575654655441406  
**H**:Helix; **S**:Strand; **C**:Coil

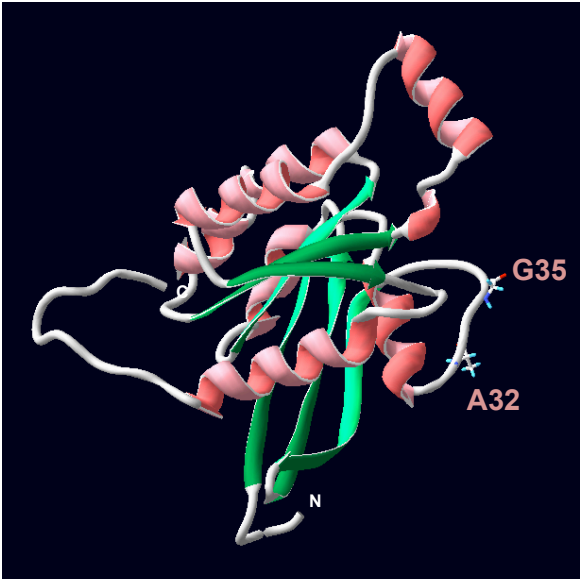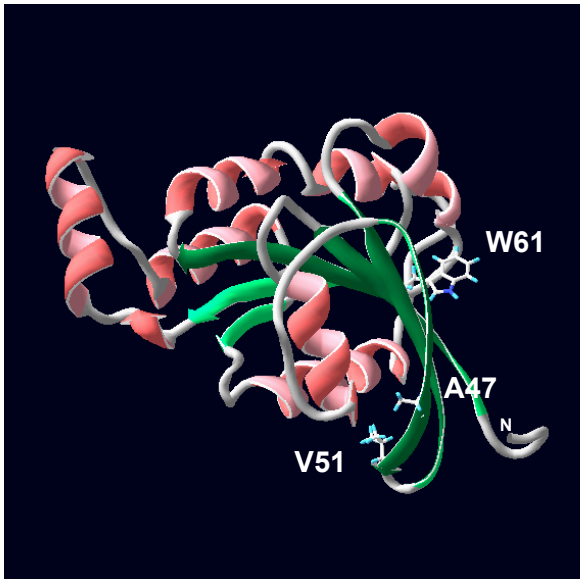

Supplement: ppat.1006840.s010.pdf [file ppat.1006840.s010.pdf]
