# Supplementary material for: Two closely related Rho GTPases, Cdc42 and RacA, of the en-dophytic fungus Epichloë festucae have contrasting roles for ROS production and symbiotic infection synchronized with the host plant
Source: PubMed Central journal article supplement (PMC5785021; doi:10.1371/journal.ppat.1006840), 2018-01-25

**WT/CA-Cdc42**

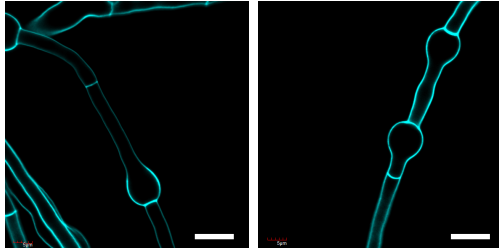

**WT/CA-RacA**

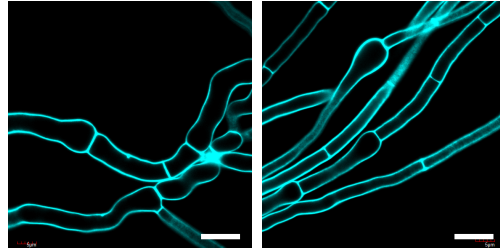

**$\Delta$ noxR/CA-Cdc42**

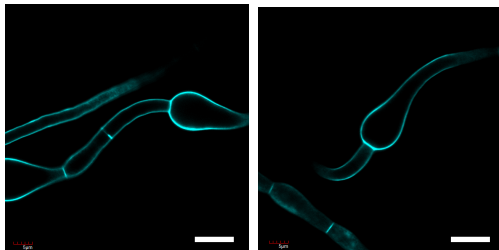

**$\Delta$ noxR/CA-RacA**

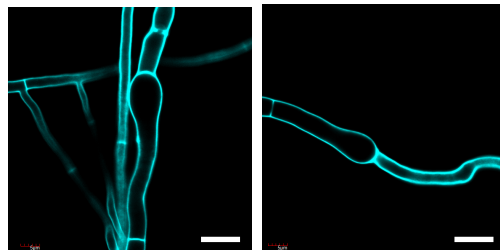

**$\Delta$ bemA/CA-Cdc42**

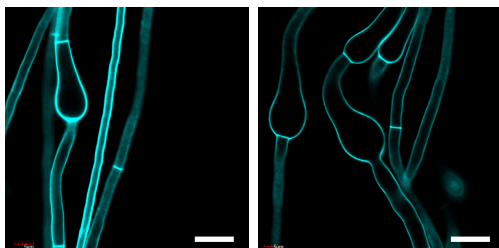

**$\Delta$ bemA/CA-RacA**

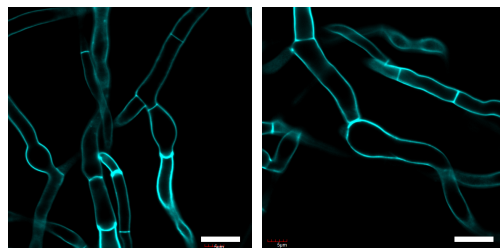

Supplement: ppat.1006840.s003.pdf [file ppat.1006840.s003.pdf]
