# Supplementary material for: Two closely related Rho GTPases, Cdc42 and RacA, of the en-dophytic fungus Epichloë festucae have contrasting roles for ROS production and symbiotic infection synchronized with the host plant
Source: PLoS Pathog. 2018 Jan 25;14(1):e1006840. doi: 10.1371/journal.ppat.1006840 (PMC5785021; doi:10.1371/journal.ppat.1006840)
Supplement: S6 Table — (XLS) [file ppat.1006840.s020.xls]

## Sheet: Sheet1
S6 Table. Primers for construction of vectors for yeast two-hybrid assay.
Primer name	Sequence 5'→3'
Primers for sequencing of vectors
3AD seq	AGATGGTGCACGATGCACAG
3BK seq2	TCGCCCGGAATTAGCTTGGC
Primers for construction of Yeast two-hybrid vectors
EfRacAmC-BI-R	GGATCCTTACAGGATTGAAGCCTT
EfCdc42mC-XhI-R	CTCGAGTTACAGGACCAGAGCCTT
IF-pGBKT7(NdeI)-R	CATATGCAGGTCCTCCTCTG
IF-pGBKT7(BamHI)-F	GGATCCGTCGACCTGCAGCG
IF-Ef29-F	GAGGACCTGCATATGGCGTCACAATATCGC
IF-Ef29-mC-R	CAGGTCGACGGATCCTTACAGAATCTGGGCCCTTC
IF-Ef147-F	GAGGACCTGCATATGGCCAATTCAAATTCT
IF-Ef147-mC-R	CAGGTCGACGGATCCTTACAGAACAACAGCAGCACCA
IF-Ef155-F	GAGGACCTGCATATGGACCCTGAAGTTGTC
IF-Ef155-mC-R	CAGGTCGACGGATCCTTACATGACGACGGCACCAC
IF-Ef194-F	GAGGACCTGCATATGGCTGAGATTCGACGA
IF-Ef194-mC-R	CAGGTCGACGGATCCTTACAAAACAAGGGCCTTCT
IF-Ef528-F	GAGGACCTGCATATGCCTCTCTGCGGCGGA
IF-Ef528-mC-R	CAGGTCGACGGATCCTCACATGACTGTGGCTTTGT
EI-EfCdc42-1-XhI-F	GAATTCATGGCGGTCGTCGCAA
EI-EfCdc42-1-XhI-R	CTCGAGCCATCCTGTCA
XhI-EfCdc42-2-BI-F	CTCGAGAGCTTGGCGCT
XhI-EfCdc42-2-BI-R	GGATCCTTACAGGACCAGACAC
EI-EfRacA-1-XhI-F	GAATTCATGGCTCAACCCGGTG
EI-EfRacA-1-XhI-R	CTCGAGCGCAAGCCAAT
XhI-EfRacA-2-BI-F	CTCGAGAAATCAAGGCT
XhI-EfRacA-2-BI-R	GGATCCTTACAGGATTGAACAC
EfCdc42-R1-EV-R	TTAAGATATCGAAGACGGTCGGGACGTATT
EfCdc42-R1-2-R	GGTCGGGACGTATTCGGAGGGGAAGGCGTT
EfCdc42-R2-EV-R	GGTCGGGACGTATTCGCCGGGGAACTTGTT
EfCdc42-R3-EV-R	TTAAGATATCGAAGACGGTCGGGATGTATT
HpI-EfCdc42-R4-F	TTAAGTTAACTATGCCGCGACGGTAATGAT
HpI-EfCdc42-R5-F	TTAAGTTAACTATGCCGTCACGGTAATG
HpI-EfCdc42-R5-2-F	GTTAACTATGCCGTCACGGTAATGGTCGGT
EfCdc42-R6-F	AACTATGCCGTCACGGTAATGATTGATGAC
EfCdc42-R7-1-F	TATGCCGTCACGGTAATGATTGGTGACGAG
EfCdc42-R7-2-F	GTAATGATTGGTGACGAGCCTTATAGCCTT
EfCdc42-R8-1-F	GTAATGATTGGTGACGAGCCTTATACCCTT
EfCdc42-R8-2-F	GACGAGCCTTATACCCTTGGATTATGGGAT
EfRacA-C1-EV-R	GATATCGAAGACTGTCGGAATGTACTCGCC
EfRacA-C1-2-R	TGTCGGAATGTACTCGCCGGGGAACTTATT
EfRacA-C2-EV-R	ATCGAAGACTGTCGGAATGTACTCGCTGGG
EfRacA-C3-EV-R	GATATCGAAGACTGTCGGAACGTA
HpI-EfRacA-C4-F	GTTAACTACTCGGTGAGTGT
HpI-EfRacA-C5-F	GTTAACTACTCGGCGAGTGTCATGATCGAT
EfRacA-C6-F	CTACTCGGCGAGTGTCATGGTCGGTGGAAA
EfRacA-C7-1-F	CTACTCGGCGAGTGTCATGGTCGATGGAAA
EfRacA-C7-2-F	GTCATGGTCGATGGAAAGCCCATCACCCTT
EfRacA-C8-1-F	GTCATGGTCGATGGAAAGCCCATCAGCCTT
EfRacA-C8-2-F	GGAAAGCCCATCAGCCTTGGATTGTTCGAT
EfCdc42-C1,2-EV-R	GATATCGAAGACGGTCGGGACGTATTCGCC
EfCdc42-C1,2-2-R	GGTCGGGACGTATTCGCCGGGGAAGGCGTT
Restriction enzyme sites are in red letters. Mismatches to introduce amino acid substitution are highlighted in blue.
Extension sequences for In-fusion reaction are in green letters
